# Supplementary material for: COVID-19 market disruptions and food security: Evidence from households in rural Liberia and Malawi
Source: PubMed Central journal article supplement (PMC9359542; doi:10.1371/journal.pone.0271488), 2022-08-08
Supplement: pone.0271488.s002.pdf [file pone.0271488.s002.pdf]

## S2 Fig: Crop Calendar of Major Food Crops

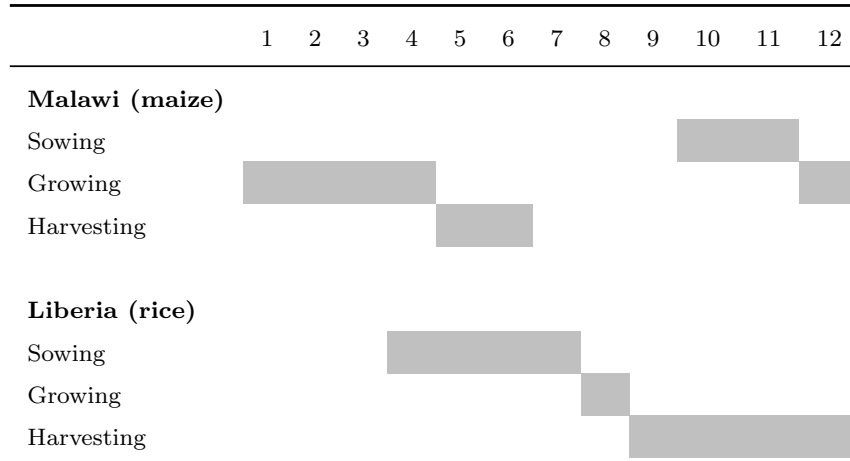

Source: FAO Global Information and Early Warning System (GIEWS). Lean season is November-February in Malawi and June-August in Liberia.
