# Supplementary material for: COVID-19 market disruptions and food security: Evidence from households in rural Liberia and Malawi
Source: PubMed Central journal article supplement (PMC9359542; doi:10.1371/journal.pone.0271488), 2022-08-08
Supplement: pone.0271488.s003.pdf [file pone.0271488.s003.pdf]

### S3 Fig: Historical Price Trends

#### Liberia: 2011-2018

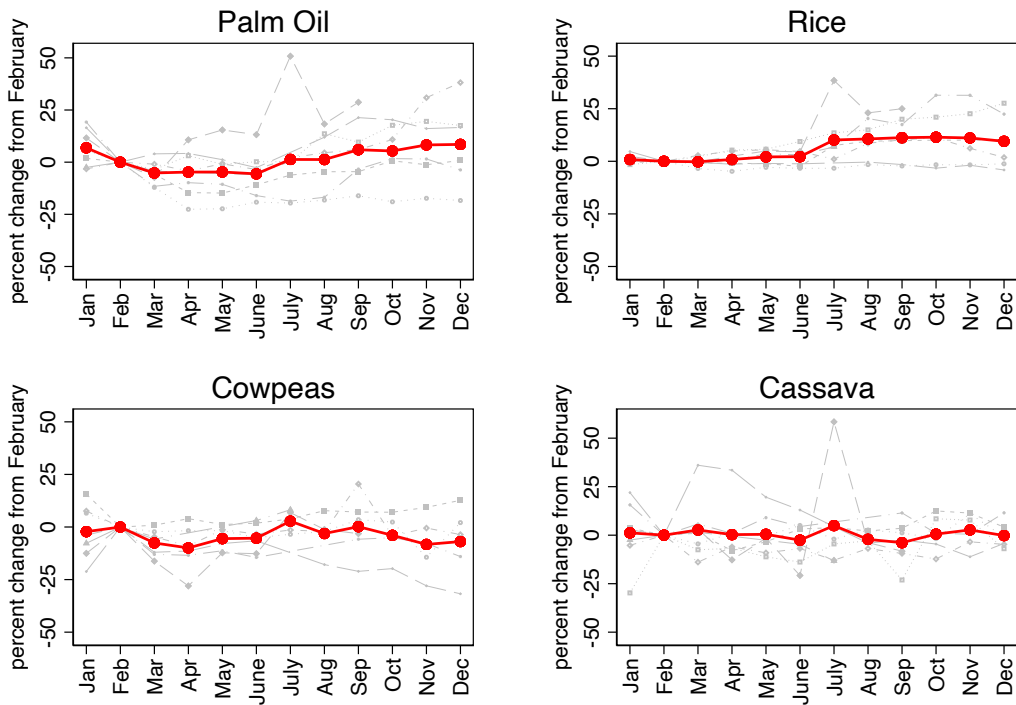

#### Malawi: 2012-2019

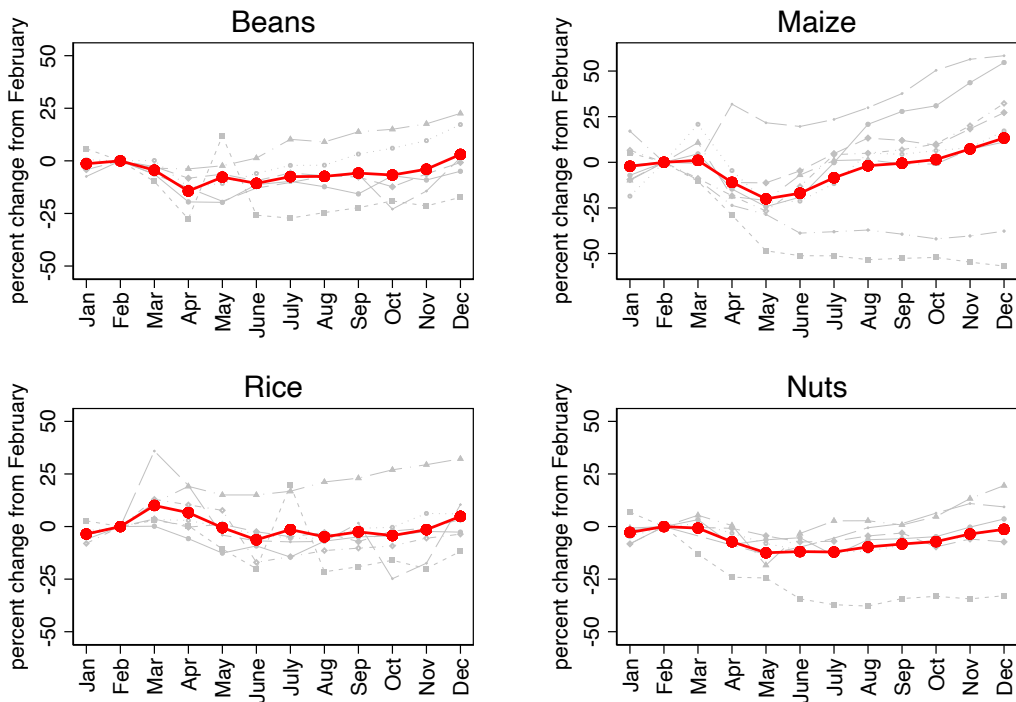

Note: Data is from the World Food Programme. For each month, we calculate the national average price, and calculate the percentage price change from February of the same year. Each grey line shows percent price change for an individual year, while the red present the average across years.
