# Supplementary material for: COVID-19 market disruptions and food security: Evidence from households in rural Liberia and Malawi
Source: PubMed Central journal article supplement (PMC9359542; doi:10.1371/journal.pone.0271488), 2022-08-08
Supplement: pone.0271488.s006.pdf [file pone.0271488.s006.pdf]

S6 Fig: Food Security Index Component 2: Food Consumption Score (z-score)

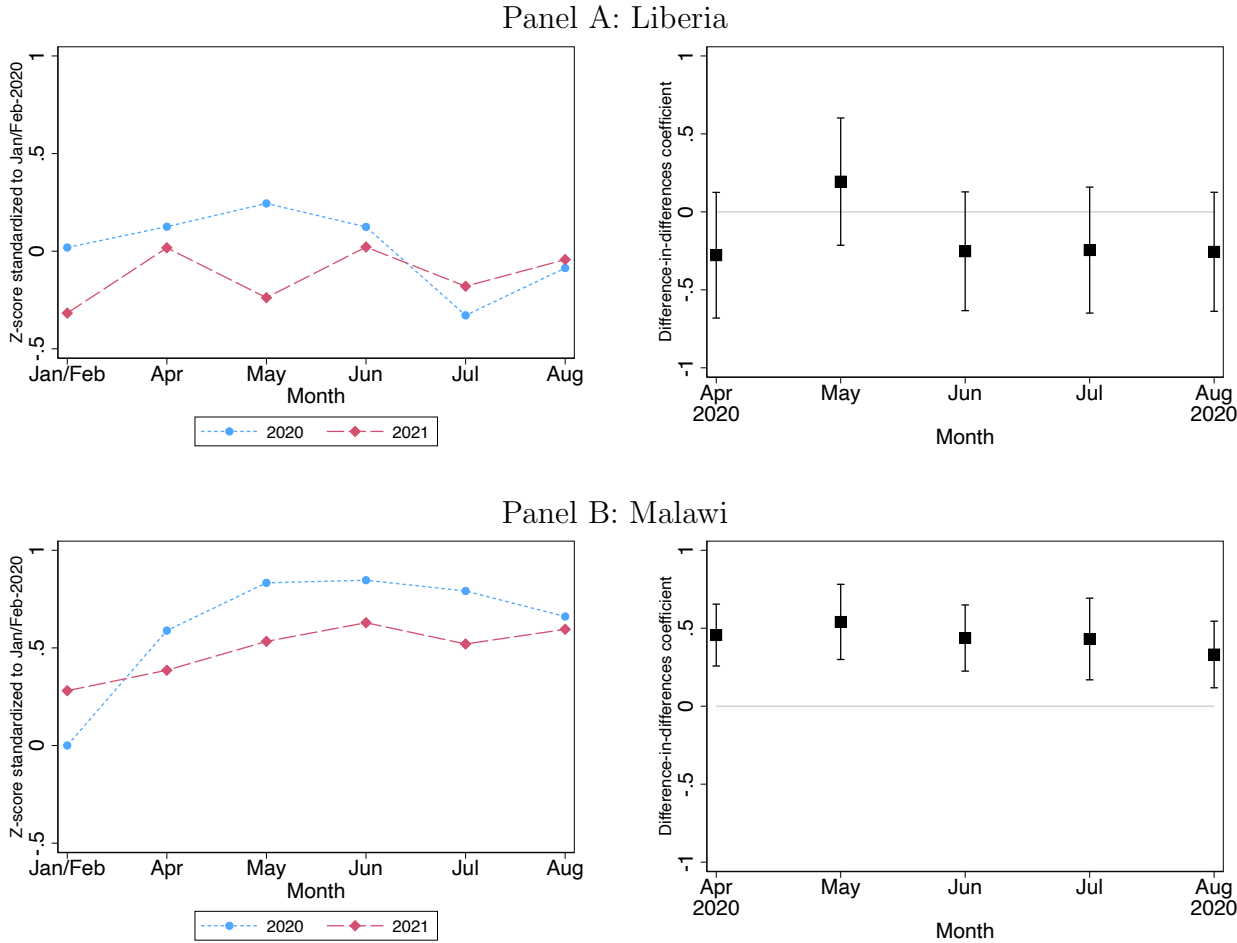

Note: This figure replicates our main result (Fig 2) for FCS, the second component of the Food Security Index.
