# Supplementary material for: COVID-19 market disruptions and food security: Evidence from households in rural Liberia and Malawi
Source: PubMed Central journal article supplement (PMC9359542; doi:10.1371/journal.pone.0271488), 2022-08-08
Supplement: pone.0271488.s007.pdf [file pone.0271488.s007.pdf]

S7 Fig: Food Security Index Component 3: Household Hunger Scale (z-score)

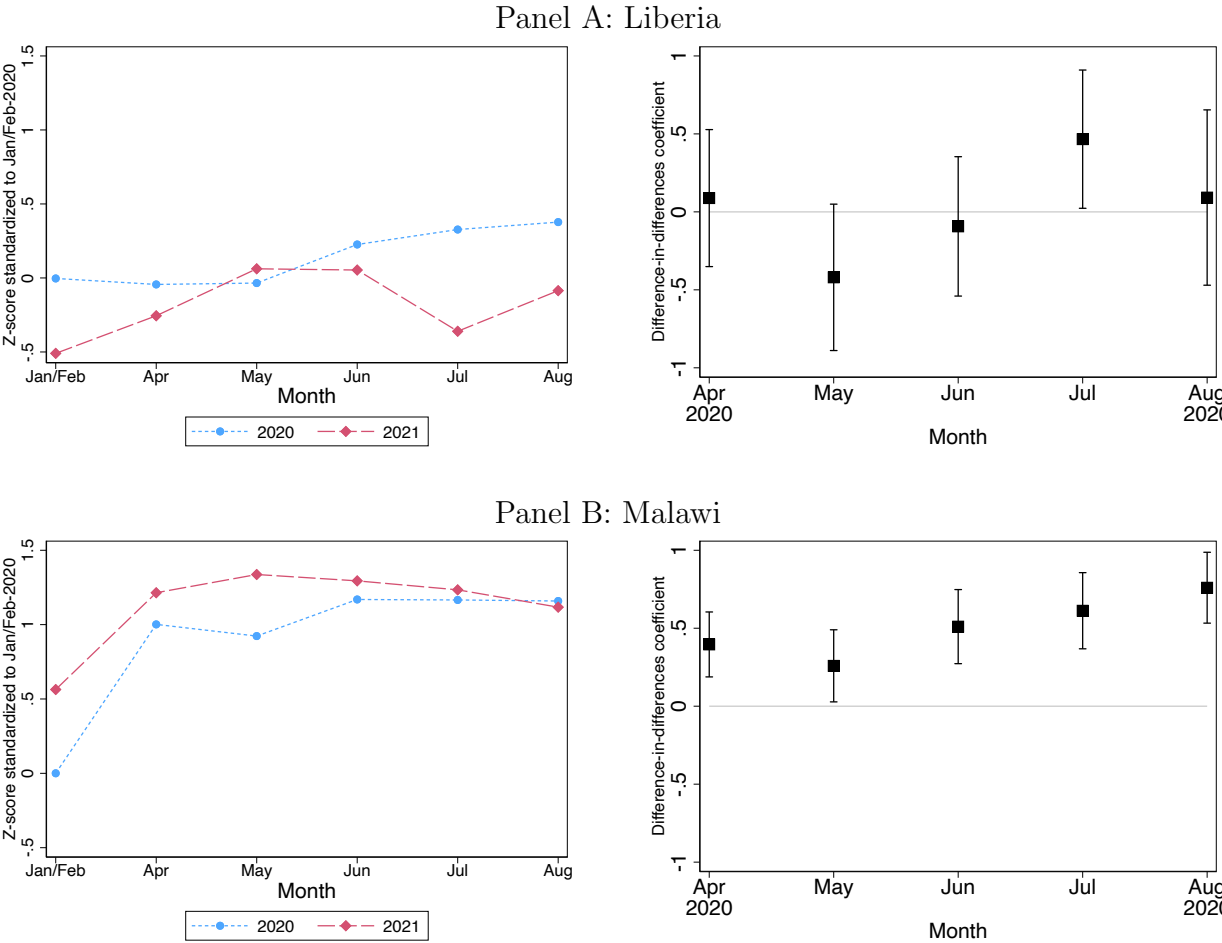

Note: This figure replicates our main result (Fig 2) for HHS, the third component of the Food Security Index.
