# Supplementary material for: COVID-19 market disruptions and food security: Evidence from households in rural Liberia and Malawi
Source: PubMed Central journal article supplement (PMC9359542; doi:10.1371/journal.pone.0271488), 2022-08-08
Supplement: pone.0271488.s009.pdf [file pone.0271488.s009.pdf]

S9 Fig: Monthly Household Total Expenditures in 2020 and 2021

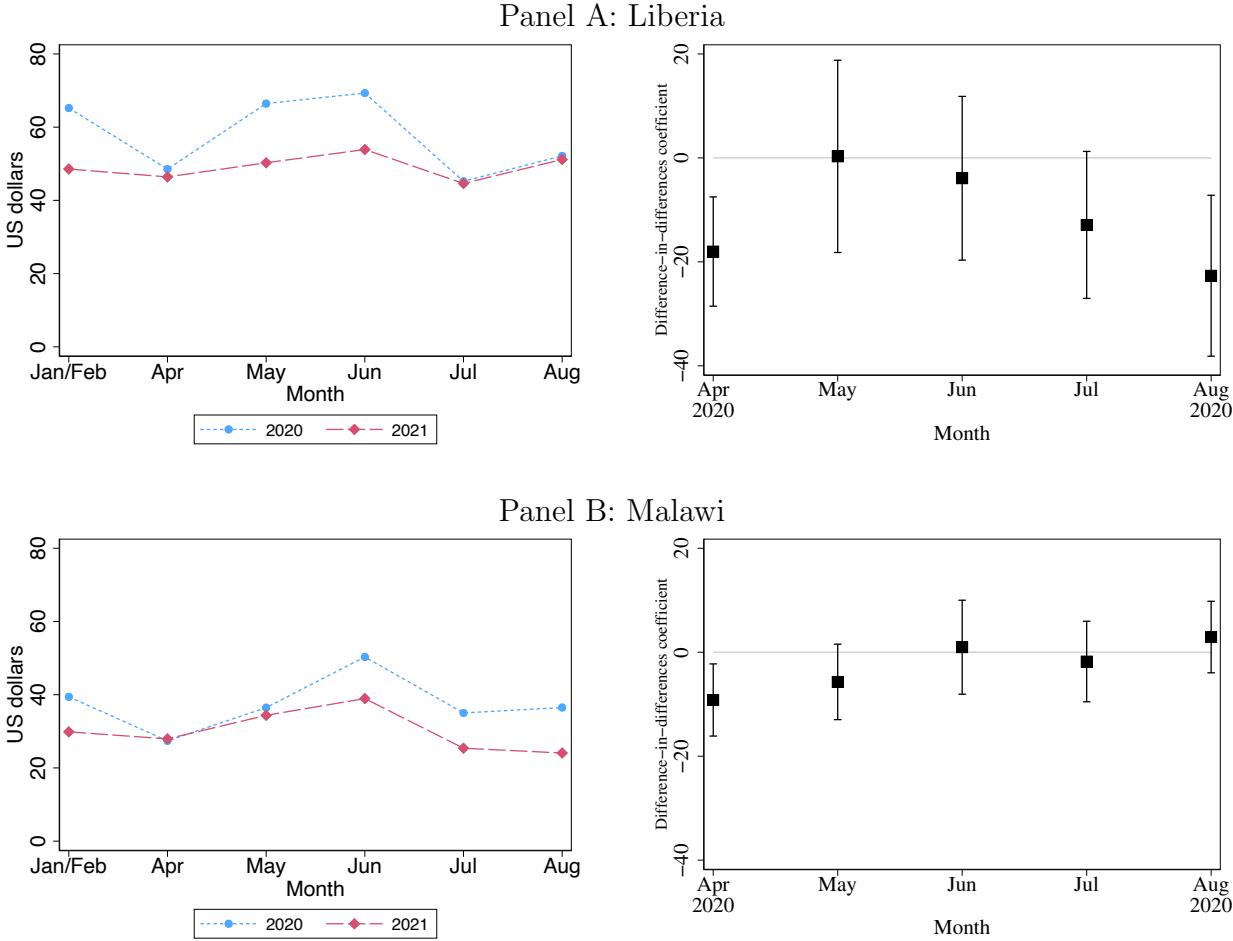

Note: Outcome is monthly total expenditure (including food expenditure) in USD. Subfigures on the left plot the change in levels across months, while those on the right report coefficients (with 95% confidence intervals) from the difference-in-differences specification in Eq 3. Regressions include household-by-calendar-month fixed effects. Standard errors are clustered at the village level.
