# Supplementary material for: COVID-19 market disruptions and food security: Evidence from households in rural Liberia and Malawi
Source: PubMed Central journal article supplement (PMC9359542; doi:10.1371/journal.pone.0271488), 2022-08-08
Supplement: pone.0271488.s011.pdf [file pone.0271488.s011.pdf]

**S1 Table: Household Phone Survey Attrition**

|                         | (1)                                        | (2)  | (3)  | (4)  | (5)  | (6)  | (7)  | (8)  | (9)  | (10) | (11) | (12) |
|-------------------------|--------------------------------------------|------|------|------|------|------|------|------|------|------|------|------|
|                         | =1 if completed survey in following month: |      |      |      |      |      |      |      |      |      |      |      |
|                         | Jan                                        | Feb  | Mar  | Apr  | May  | Jun  | Jul  | Aug  | Sep  | Oct  | Nov  | Dec  |
| <b>Panel A: Liberia</b> |                                            |      |      |      |      |      |      |      |      |      |      |      |
| 2020                    | 0.67                                       | 0.82 | 0.77 | 0.61 | 0.70 | 0.70 | 0.56 | 0.60 | 0.61 | 0.69 | 0.63 | 0.59 |
| 2021                    | 0.60                                       | 0.53 | 0.50 | 0.54 | 0.49 | 0.50 | 0.50 | 0.46 |      |      |      |      |
| <b>Panel B: Malawi</b>  |                                            |      |      |      |      |      |      |      |      |      |      |      |
| 2020                    | 0.89                                       | 0.90 | 0.91 | 0.92 | 0.91 | 0.97 | 0.97 | 0.94 | 0.95 | 0.97 | 1.00 | 0.77 |
| 2021                    | 0.79                                       | 0.89 | 0.87 | 0.83 | 0.83 | 0.81 | 0.81 | 0.77 |      |      |      |      |

Note: The Liberia results (Panel A) include only Wave 2 of the study (since coverage over this time period was spotty in Wave 1). There are 206 respondents in Liberia and 297 respondents in Malawi. Half of the phone survey sample was called for each month.
