# Supplementary material for: COVID-19 market disruptions and food security: Evidence from households in rural Liberia and Malawi
Source: PubMed Central journal article supplement (PMC9359542; doi:10.1371/journal.pone.0271488), 2022-08-08
Supplement: pone.0271488.s012.pdf [file pone.0271488.s012.pdf]

**S2 Table: Correlates of Attrition from Analysis Sample**

|                                                    | (1)                                     | (2)                |
|----------------------------------------------------|-----------------------------------------|--------------------|
|                                                    | Dep. variable: =1 if in analysis sample |                    |
|                                                    | Liberia                                 | Malawi             |
| <b>Panel A: Demographics</b>                       |                                         |                    |
| =1 if female                                       | -0.06<br>(0.07)                         | -0.04***<br>(0.01) |
| Age (divided by 10)                                | 0.04*<br>(0.02)                         | 0.00<br>(0.01)     |
| =1 if currently married or has partner             | -0.05<br>(0.08)                         | 0.02<br>(0.03)     |
| Years of education (divided by 10)                 | 0.02<br>(0.08)                          | 0.04<br>(0.03)     |
| Number of household members (divided by 10)        | -0.13<br>(0.14)                         | 0.02<br>(0.05)     |
| <b>Panel B: Expenditure and assets</b>             |                                         |                    |
| Household monthly expenditure (Thou. USD)          | 0.33<br>(0.60)                          | 0.19*<br>(0.10)    |
| Household food expenditure (Thou. USD)             | 0.92<br>(1.84)                          | 0.76<br>(0.51)     |
| =1 if respondent has access to mobile phone        | 0.25***<br>(0.05)                       | 0.01<br>(0.02)     |
| =1 if house owned                                  | -0.08<br>(0.06)                         | 0.03<br>(0.04)     |
| =1 if house has thatch roof                        | -0.20**<br>(0.09)                       | -0.05**<br>(0.02)  |
| Total value of land and housing (Thou. USD)        | -0.05<br>(0.08)                         | 0.01***<br>(0.00)  |
| Total value of physical assets (Thou. USD)         | 0.33<br>(1.13)                          | 0.11<br>(0.10)     |
| Net value of financial assets (Thou. USD)          | 1.41<br>(1.44)                          | -0.49<br>(0.43)    |
| <b>Panel C: Food security</b>                      |                                         |                    |
| <i>For any household member in the past month:</i> |                                         |                    |
| =1 if skipped a meal                               | 0.11*<br>(0.06)                         | -0.02<br>(0.02)    |
| =1 if went to sleep hungry                         | 0.12*<br>(0.06)                         | -0.03<br>(0.02)    |
| =1 if had no food for an entire day                | 0.08<br>(0.08)                          | -0.01<br>(0.03)    |
| Mean Dependent variable                            | 0.73                                    | 0.96               |
| Observations                                       | 206                                     | 297                |

Note: The table shows coefficients from bivariate regressions for each covariate using compliance as dependent variable. Compliance is defined as 1 if the household ever appears in the analysis of this paper, and 0 otherwise. Standard errors are clustered at the village level.
