# Supplementary material for: COVID-19 market disruptions and food security: Evidence from households in rural Liberia and Malawi
Source: PubMed Central journal article supplement (PMC9359542; doi:10.1371/journal.pone.0271488), 2022-08-08
Supplement: pone.0271488.s013.pdf [file pone.0271488.s013.pdf]

**S3 Table: Correlates of Attrition from Balanced Sample**

|                                                    | (1)                                         | (2)               |
|----------------------------------------------------|---------------------------------------------|-------------------|
|                                                    | Dep. variable: % of survey rounds completed |                   |
|                                                    | Liberia                                     | Malawi            |
| <b>Panel A: Demographics</b>                       |                                             |                   |
| =1 if female                                       | -0.07**<br>(0.03)                           | -0.04<br>(0.03)   |
| Age (divided by 10)                                | 0.01<br>(0.01)                              | 0.00<br>(0.01)    |
| =1 if currently married or has partner             | -0.02<br>(0.03)                             | 0.01<br>(0.02)    |
| Years of education (divided by 10)                 | 0.01<br>(0.04)                              | 0.02<br>(0.03)    |
| Number of household members (divided by 10)        | 0.02<br>(0.06)                              | 0.03<br>(0.04)    |
| <b>Panel B: Expenditure and assets</b>             |                                             |                   |
| Household monthly expenditure (Thou. USD)          | 0.64**<br>(0.27)                            | 0.26<br>(0.16)    |
| Household food expenditure (Thou. USD)             | 0.11<br>(0.82)                              | 1.32***<br>(0.47) |
| =1 if respondent has access to mobile phone        | 0.09***<br>(0.03)                           | 0.02<br>(0.02)    |
| =1 if house owned                                  | 0.05<br>(0.03)                              | 0.05**<br>(0.02)  |
| =1 if house has thatch roof                        | -0.04<br>(0.05)                             | -0.01<br>(0.02)   |
| Total value of land and housing (Thou. USD)        | 0.03<br>(0.05)                              | 0.01<br>(0.00)    |
| Total value of physical assets (Thou. USD)         | 0.22<br>(0.45)                              | 0.18***<br>(0.06) |
| Net value of financial assets (Thou. USD)          | -0.57<br>(0.70)                             | -0.53<br>(0.55)   |
| <b>Panel C: Food security</b>                      |                                             |                   |
| <i>For any household member in the past month:</i> |                                             |                   |
| =1 if skipped a meal                               | 0.00<br>(0.03)                              | -0.01<br>(0.02)   |
| =1 if went to sleep hungry                         | 0.02<br>(0.03)                              | -0.02<br>(0.02)   |
| =1 if had no food for an entire day                | 0.01<br>(0.04)                              | -0.03<br>(0.02)   |
| Mean Dependent variable                            | 0.75                                        | 0.85              |
| Observations                                       | 150                                         | 285               |

Note: The sample is restricted to households which appear in the analysis of this paper. Each entry is a separate bivariate regression, in which the dependent variable is the proportion of survey rounds in which the household completed a phone survey. Standard errors are clustered at the village level.
