# Supplementary material for: COVID-19 market disruptions and food security: Evidence from households in rural Liberia and Malawi
Source: PubMed Central journal article supplement (PMC9359542; doi:10.1371/journal.pone.0271488), 2022-08-08
Supplement: pone.0271488.s014.pdf [file pone.0271488.s014.pdf]

**S4 Table: Household Characteristics in Representative Surveys**

|                                                 | (1)               | (2)    | (3)        | (4)    | (5)                   | (6)      | (7)        | (8)    |
|-------------------------------------------------|-------------------|--------|------------|--------|-----------------------|----------|------------|--------|
|                                                 | Liberia HIES 2016 |        |            |        | Malawi IHS5 2019-2020 |          |            |        |
|                                                 | Rural             |        | Study Area |        | Rural                 |          | Study Area |        |
|                                                 | Mean              | SD     | Mean       | SD     | Mean                  | SD       | Mean       | SD     |
| <b>Panel A: Demographics</b>                    |                   |        |            |        |                       |          |            |        |
| Age                                             | 43.92             | 35.89  | 42.96      | 13.36  | 43.86                 | 16.75    | 43.14      | 17.18  |
| =1 if currently married or has partner          | 0.82              |        | 0.81       |        | 0.69                  |          | 0.64       |        |
| Years of education                              | 2.42              | 2.35   | 2.39       | 2.21   | 5.57                  | 2.52     | 5.27       | 2.39   |
| Number of household members                     | 5.37              | 2.19   | 5.51       | 2.22   | 4.43                  | 2.04     | 4.28       | 1.95   |
| <b>Panel B: Income, expenditure, and assets</b> |                   |        |            |        |                       |          |            |        |
| =1 planted any crop                             | 0.89              |        | 0.99       |        | 0.40                  |          | 0.79       |        |
| =1 if sold any harvest                          | 0.56              |        | 0.52       |        | 0.30                  |          | 0.44       |        |
| =1 if owns a business enterprise                | 0.21              |        | 0.25       |        | 0.57                  |          | 0.19       |        |
| =1 if household owns a mobile phone             | 0.35              |        | 0.46       |        | 0.70                  |          | 0.50       |        |
| =1 if house owned                               | 0.66              |        | 0.85       |        | 0.52                  |          | 0.75       |        |
| =1 if house has thatch roof                     | 0.26              |        | 0.51       |        | 0.12                  |          | 0.47       |        |
| Household food expenditure                      | 20.22             | 17.23  | 14.94      | 15.68  | 23.87                 | 17.18    | 10.15      | 10.18  |
| Business income (USD)                           | 3.27              | 13.54  | 2.31       | 10.69  | 89.19                 | 368.63   | 21.09      | 72.44  |
| Total value of physical assets                  | 74.26             | 137.59 | 98.26      | 190.71 | 518.99                | 1,060.31 | 275.62     | 808.58 |
| Durable goods (USD)                             | 26.22             | 65.27  | 54.28      | 126.10 | 490.56                | 1,055.90 | 196.58     | 709.54 |
| Livestock (USD)                                 | 48.04             | 113.69 | 43.98      | 116.95 | 28.43                 | 143.87   | 79.04      | 298.43 |
| <b>Panel C: Food security</b>                   |                   |        |            |        |                       |          |            |        |
| =1 if insufficient food in past 12 months       | 0.92              |        | 0.88       |        | 0.53                  |          | 0.68       |        |
| Household dietary diversity score (0-12)        | 5.76              | 1.88   | 5.51       | 1.67   | 8.93                  | 1.80     | 8.44       | 2.22   |
| Food Consumption Score (0-112)                  | 48.17             | 15.86  | 46.22      | 15.07  | 54.07                 | 16.18    | 44.30      | 17.12  |
| Observations                                    | 5570              |        | 740        |        | 9342                  |          | 688        |        |

Note: This table presents summary statistics from representative, living standards household surveys (the 2016 Liberia HIES and the 2019-2020 Malawi IHS5). In columns 1-2 and 5-6, statistics are restricted to rural households. In Liberia, the study areas are Bong and Nimba counties; in Malawi, they are Chiradzulu and Machinga districts. Sample weights are used to recover population estimates. All monetary values are in USD and winsorized at the 99th percentile.
