# Supplementary material for: COVID-19 market disruptions and food security: Evidence from households in rural Liberia and Malawi
Source: PubMed Central journal article supplement (PMC9359542; doi:10.1371/journal.pone.0271488), 2022-08-08
Supplement: pone.0271488.s015.pdf [file pone.0271488.s015.pdf]

**S5 Table: Awareness and Attitudes**

|                                                                         | (1)<br>Liberia | (2)<br>Malawi |
|-------------------------------------------------------------------------|----------------|---------------|
| <b>Panel A: Basic awareness</b>                                         |                |               |
| =1 if respondent:                                                       |                |               |
| is aware of recent virus outbreak                                       | 0.98           | 0.99          |
| knows that it's called coronavirus/COVID-19                             | 0.90           | 1.00          |
| thinks it's a real public health problem                                | 0.95           | 0.98          |
| <b>Panel B: Opinions about government response to COVID</b>             |                |               |
| Do you trust the information central gov't is providing? <sup>a</sup>   | 4.37           | 4.71          |
| Do you trust the information local leaders are providing? <sup>a</sup>  | 4.39           | 4.68          |
| =1 if central gov't and local leaders give different info               | 0.05           | 0.12          |
| Do you think gov't measures to prevent spread are helpful? <sup>b</sup> | 4.24           | 4.10          |
| Do you approve gov't measures? <sup>c</sup>                             | 4.19           | 4.09          |
| <b>Panel C: Support from government/NGO during lockdown</b>             |                |               |
| =1 if received cash transfers                                           |                | 0.00          |
| =1 if received food support                                             |                | 0.00          |
| <b>Panel D: Concern about COVID contraction</b>                         |                |               |
| =1 if worried or extremely worried about COVID contraction              | 0.87           | 0.93          |
| =1 if knows anyone who tested for COVID-19                              | 0.04           | 0.09          |

Note:

<sup>a</sup> 0-5 scale index. 0 - have not received any guidelines; 1 - don't trust at all; 2 - somewhat distrust; 3 - neither trust nor distrust; 4 - somewhat trust; 5 - trust completely.

<sup>b</sup> 1-5 scale index. 1 - not at all helpful; 2 - not helpful; 3 - neither helpful nor not helpful; 4 - helpful; 5 - very helpful.

<sup>c</sup> 1-5 scale index. 1 - strongly disapprove; 2 - disapprove; 3 - neither approve nor disapprove; 4 - approve; 5 - strongly approve.
