# Supplementary material for: COVID-19 market disruptions and food security: Evidence from households in rural Liberia and Malawi
Source: PubMed Central journal article supplement (PMC9359542; doi:10.1371/journal.pone.0271488), 2022-08-08
Supplement: pone.0271488.s016.pdf [file pone.0271488.s016.pdf]

**S6 Table: Change in Business Outcomes for Food Vendors**

|                         | (1)<br>No. of<br>customers<br>(daily) | (2)<br>Revenue<br>(monthly) | (3)<br>Profit<br>(monthly) | (4)<br>Other<br>income<br>(monthly) |
|-------------------------|---------------------------------------|-----------------------------|----------------------------|-------------------------------------|
| <b>Panel A: Liberia</b> |                                       |                             |                            |                                     |
| April                   | -14.41***<br>(0.79)                   | -101.60***<br>(11.61)       | -24.63***<br>(2.43)        | -4.62**<br>(2.18)                   |
| May                     | -12.20***<br>(0.92)                   | -101.52***<br>(20.69)       | -18.91***<br>(3.84)        | -2.82<br>(2.40)                     |
| June                    | -10.34***<br>(1.09)                   | -86.52***<br>(23.79)        | -14.13***<br>(4.45)        | -1.33<br>(2.43)                     |
| February mean           | 31.66                                 | 256.58                      | 47.53                      | 7.73                                |
| February SD             | 21.39                                 | 405.33                      | 69.56                      | 55.20                               |
| F statistic             | 114.76                                | 30.43                       | 40.45                      | 3.22                                |
| Observations            | 2,200                                 | 2,200                       | 2,200                      | 2,200                               |
| No. of vendors          | 676                                   | 676                         | 676                        | 676                                 |
| <b>Panel B: Malawi</b>  |                                       |                             |                            |                                     |
| April                   | -22.12***<br>(1.64)                   | -182.01***<br>(30.12)       | -44.34***<br>(4.92)        | -17.50***<br>(6.23)                 |
| May                     | -23.80***<br>(2.44)                   | -136.60***<br>(50.38)       | -32.20***<br>(6.82)        | 2.64<br>(8.46)                      |
| June                    | -24.88***<br>(2.40)                   | -118.67**<br>(48.05)        | -21.73***<br>(7.68)        | 3.40<br>(6.86)                      |
| February mean           | 67.68                                 | 592.57                      | 103.59                     | 34.80                               |
| February SD             | 73.82                                 | 1276.22                     | 196.02                     | 188.23                              |
| F statistic             | 61.53                                 | 12.73                       | 28.49                      | 5.95                                |
| Observations            | 3,813                                 | 3,813                       | 3,813                      | 3,813                               |
| No. of vendors          | 1,042                                 | 1,042                       | 1,042                      | 1,042                               |

Note: All variables are winsorized at the 99th percentile. All monetary values are in USD. Standard errors are clustered at the market level.
