# Supplementary material for: COVID-19 market disruptions and food security: Evidence from households in rural Liberia and Malawi
Source: PubMed Central journal article supplement (PMC9359542; doi:10.1371/journal.pone.0271488), 2022-08-08
Supplement: pone.0271488.s017.pdf [file pone.0271488.s017.pdf]

**S7 Table: Household Food Security Index (z-score)**

|                   | (1)               | (2)                      | (3)             | (4)               | (5)                      | (6)               |
|-------------------|-------------------|--------------------------|-----------------|-------------------|--------------------------|-------------------|
|                   | Liberia           |                          |                 | Malawi            |                          |                   |
|                   | Event Study       | Difference-in Difference |                 | Event Study       | Difference-in Difference |                   |
| April 2020        | 0.18<br>(0.13)    | -0.20<br>(0.17)          | -0.23<br>(0.19) | 1.12***<br>(0.09) | 0.52***<br>(0.10)        | 0.52***<br>(0.10) |
| May 2020          | 0.10<br>(0.14)    | -0.03<br>(0.21)          | -0.01<br>(0.24) | 1.01***<br>(0.09) | 0.51***<br>(0.11)        | 0.51***<br>(0.11) |
| June 2020         | 0.39***<br>(0.14) | -0.15<br>(0.16)          | -0.24<br>(0.18) | 1.40***<br>(0.09) | 0.63***<br>(0.11)        | 0.61***<br>(0.11) |
| July 2020         | -0.03<br>(0.15)   | 0.16<br>(0.18)           | 0.23<br>(0.21)  | 1.22***<br>(0.09) | 0.72***<br>(0.11)        | 0.73***<br>(0.11) |
| Aug 2020          | 0.39**<br>(0.16)  | 0.17<br>(0.18)           | 0.27<br>(0.21)  | 1.38***<br>(0.09) | 0.75***<br>(0.10)        | 0.81***<br>(0.10) |
| Jan-Feb 2020 mean | 0.00              | 0.00                     | -0.01           | 0.00              | 0.00                     | 0.02              |
| Jan-Feb 2020 SD   | 1.00              | 1.00                     | 1.03            | 1.00              | 1.00                     | 1.00              |
| Observations      | 456               | 808                      | 634             | 960               | 1,795                    | 1,635             |
| No. of households | 150               | 150                      | 129             | 285               | 285                      | 272               |

Note: This table shows regression results for Fig 2. The dependent variable is the Food Security Index (z-score). Columns 1 and 4 report coefficients from the event study regressions as specified in Eq 1 using the data for 2020. Columns 2 and 5 show difference-in-difference regressions specified in Eq 2; columns 3 and 6 display results from Eq 3 (i.e., the right-hand-side subfigures in Fig 2). All regressions include household fixed effects and standard errors clustered at the village level. Columns 3 and 6 additionally include household-by-calendar-month fixed effects, so that we compare the same set of households for each calendar month in 2020 and 2021.
