# Supplementary material for: COVID-19 market disruptions and food security: Evidence from households in rural Liberia and Malawi
Source: PubMed Central journal article supplement (PMC9359542; doi:10.1371/journal.pone.0271488), 2022-08-08
Supplement: pone.0271488.s019.pdf [file pone.0271488.s019.pdf]

**S9 Table: Non-agricultural Income**

|                         | (1)                | (2)               | (3)                    | (4)             | (5)                              | (6)             |
|-------------------------|--------------------|-------------------|------------------------|-----------------|----------------------------------|-----------------|
|                         | Business profit    |                   | Casual<br>Labor income |                 | Other<br>Non-agricultural income |                 |
| <b>Panel A: Liberia</b> |                    |                   |                        |                 |                                  |                 |
| April 2020              | 1.01<br>(0.93)     | 0.45<br>(1.39)    | 3.98***<br>(1.29)      | 1.64<br>(1.77)  | 3.67***<br>(1.25)                | 2.45<br>(1.74)  |
| May 2020                | -2.72***<br>(0.96) | -2.25<br>(1.38)   | 1.79<br>(1.69)         | 4.35*<br>(2.61) | 1.77<br>(1.62)                   | 4.81*<br>(2.62) |
| June 2020               | 0.03<br>(0.67)     | -1.21<br>(1.05)   | 0.96**<br>(0.45)       | -1.24<br>(1.07) | 0.82**<br>(0.38)                 | -0.19<br>(0.95) |
| July 2020               | -2.82***<br>(0.87) | -2.50**<br>(0.96) | 1.57<br>(1.45)         | 3.42*<br>(2.00) | 1.94<br>(1.34)                   | 3.28*<br>(1.92) |
| August 2020             | -0.55<br>(0.91)    | -1.43<br>(1.10)   | 1.70*<br>(0.86)        | -2.49<br>(2.41) | 1.07*<br>(0.64)                  | -2.43<br>(2.21) |
| Jan-Feb 2020 mean       | 3.34               | 3.25              | 2.62                   | 2.50            | 1.38                             | 1.37            |
| Jan-Feb 2020 SD         | 7.27               | 7.37              | 6.67                   | 6.10            | 6.21                             | 5.66            |
| Observations            | 456                | 634               | 456                    | 634             | 456                              | 634             |
| No. of households       | 150                | 129               | 150                    | 129             | 150                              | 129             |
| <b>Panel B: Malawi</b>  |                    |                   |                        |                 |                                  |                 |
| April 2020              | 0.23<br>(0.40)     | -0.36<br>(0.56)   | -3.78***<br>(0.76)     | -1.55<br>(1.05) | -0.01<br>(0.03)                  | 0.34<br>(0.42)  |
| May 2020                | -0.11<br>(0.37)    | -0.70<br>(0.65)   | -2.82***<br>(0.81)     | 0.04<br>(0.93)  | -0.27<br>(0.30)                  | 0.12<br>(0.46)  |
| June 2020               | 0.22<br>(0.36)     | -0.51<br>(0.61)   | -2.73***<br>(0.81)     | -0.92<br>(1.17) | 0.02<br>(0.09)                   | -0.35<br>(0.48) |
| July 2020               | 0.25<br>(0.38)     | -1.00<br>(0.61)   | -2.64***<br>(0.74)     | 0.74<br>(1.07)  | -0.14<br>(0.32)                  | 0.01<br>(0.50)  |
| August 2020             | 0.69*<br>(0.41)    | -0.26<br>(0.56)   | -3.07***<br>(0.78)     | -0.40<br>(1.01) | 0.39*<br>(0.21)                  | 0.04<br>(0.56)  |
| Jan-Feb 2020 mean       | 0.94               | 0.99              | 6.55                   | 6.55            | 0.26                             | 0.28            |
| Jan-Feb 2020 SD         | 3.75               | 3.87              | 8.48                   | 8.40            | 2.21                             | 2.32            |
| Observations            | 960                | 1,635             | 960                    | 1,635           | 960                              | 1,635           |
| No. of households       | 285                | 272               | 285                    | 272             | 285                              | 272             |

Note: The dependent variable is monthly income in USD. Odd columns show event study regressions, and even columns difference-in-differences regressions. All regressions include household fixed effects. Standard errors clustered at the village level. Difference-in-difference regressions additionally include household-by-calendar-month fixed effects. All monetary variables are in USD and winsorized at the 99th percentile.
